# Supplementary material for: Trace Level Detection of Bisphenol A Analogues and Parabens by LC-MS/MS in Human Plasma from Malaysians
Source: Biomed Res Int. 2020 Apr 29;2020:2581287. doi: 10.1155/2020/2581287 (PMC7210526; doi:10.1155/2020/2581287)
Supplement: Supplementary Materials — Supplementary information file contains raw data before the analysis process by SPSS. [file 2581287.f1.xlsx]

## Sheet: Sheet1
ID Number	Sex	Age	Height	Wight	Race	Address	Smoking	Source of Drinking	Cosmetic Use	Plastic Use	BPAF	BPS	BPB	BPF	Propylparaben	Etylparaben	Butylparaben	Methylparaben
S101	1	29	160	66	1	KL	2	1	2	1	0	0	0	29.6	0	0	0	0
S103	1	33	162	80	1	KL	2	1	1	1	0	0	0	67.6	0	0	0	0
S104	1	29	166	63	1	KL	2	2	1	1	0	0	0	58	0	0.42	0.88	0
S105	2	29	148	48	1	KL	2	1	2	1	0	0	0	56.8	0	0	0	0
S106	2	28	168	107	1	KL	2	2	1	1	0	0	0	34.72	0	0.46	0	0
S107	2	29	155	46	1	Selangor	2	2	1	1	0	0.82	0	68.4	0	0.51	0.83	0
S108	2	30	157	49	1	Selangor	2	1	1	1	0	0	0	42.8	0	0	0	0
S109	2	34	164	78	1	Selangor	2	1	2	2	0	0	0	44.8	0	0	0.67	0
S110	2	29	166	72	1	KL	2	1	1	1	0	0	0	59.2	0	0	0	0
S111	2	27	150	51	1	Selangor	2	2	1	1	0	0	0	12.76	0	0.42	0	0
S114	2	29	157	38	1	KL	2	1	1	1	0	0	0	24.84	0	0	0.71	0
S117	2	26	157	59	1	Selangor	2	1	2	1	0	0	0	28.6	0	0	0	0
S119	2	25	152	68	1	KL	2	2	1	1	0	0	0	39.4	0.66	0	0	0
S121	1	34	163	75	1	KL	2	1	2	2	0	0	0	50.8	0	0	0.77	0
S124	2	29	156	51	1	Selangor	2	1	1	1	0	0	0	64	0	0	0	0
S127	1	33	162	75	1	Selangor	2	1	2	1	0	0	0	25.36	0	0	0	0
S128	1	32	165	74	1	KL	2	1	2	1	0	0	0	22.28	0	0	0	0
S129	2	25	155	54	1	Selangor	2	1	1	1	0	3.88	0	35.52	1.08	0	0	5
S130	2	30	154	52	1	KL	2	1	2	1	0	0	0	41.6	2.29	0	0	6.96
S131	2	27	152	41	1	KL	2	1	1	1	0	0	0	40.8	0.79	0	0	0
S132	2	32	156	58	1	Selangor	2	1	2	1	0	0	0	37.44	0	0	0	0
S134	2	37	158	51	1	Selangor	2	1	2	1	1.34	3.15	0	60.4	0	0.33	0	0
S135	2	38	152	54	1	Selangor	2	1	1	1	0	0	0	27	1.44	0	0	0
S136	1	27	178	110	1	KL	2	1	2	1	0	0	0	39.2	0.74	0	0	8.48
S138	2	38	153	52	1	KL	2	1	2	1	0	0	0	47.2	0.49	0	0	5.48
S139	1	29	171	102	1	Selangor	1	1	2	2	10.04	15.32	0	21.9	1.5	0	0	0
S141	2	41	150	67	1	Selangor	2	1	2	1	0	16.68	0	22	1.54	0	0	0
S142	1	29	166	110	1	Selangor	1	1	2	1	0	16.12	0	29.2	1.56	0	0	5.32
S143	1	29	181	134	1	Selangor	2	1	2	1	10	0	0	25.1	1.88	0	0	8.2
S144	2	25	149	65	1	Selangor	2	2	2	2	10.12	15.2	0	21.6	1.32	0	0	0
S145	1	52	160	85	1	KL	2	1	1	1	0	15.5	0	26	1.14	0	0	0
S149	2	30	160	62	1	Selangor	2	1	2	2	11.92	18.6	0	28.9	1.8	0	0	5.92
S150	2	26	161	62	1	Selangor	2	1	2	1	11.68	12.2	0	25.1	2.74	1.42	0.4	12.68
S153	1	31	181	78	1	KL	2	1	2	1	11.8	0	0	29.5	0	0	0	0
S202	1	25	167	57	1	Selangor	2	2	2	1	11.96	0	0	31.11	0	0.46	0.51	0
S203	2	22	146	62	1	Sabah	2	1	1	1	12	0	0	27.49	1.02	0	0	0
S204	2	22	157	87	1	Sarawak	2	2	1	1	12.04	0	0	29.54	0	0	0	0
S205	2	22	161	85	1	Sabah	2	1	2	1	0	0	0	28.87	1.1	0.4	0	0
S206	2	22	150	47	1	Selangor	2	2	1	1	11.88	0	0	35.43	1.51	0.44	0.51	0
S207	2	22	149	39	1	Perlis	2	1	1	2	0	0	0	33.21	0	0.55	0.37	0
S210	2	24	157	62	2	Selangor	2	2	2	1	0	0	0	28.58	1.66	0.32	0	5.04
S212	1	54	163	58	3	KL	2	1	2	1	11.76	0	0	31.85	1.17	0.41	0	0
S216	2	27	150	50	1	KL	2	1	2	1	12	12.08	0	36.54	1.12	0	0	0
S217	1	32	174	89	1	KL	1	2	2	1	11.8	0	0	35.25	1.13	0.47	0	0
S220	2	23	153	55	2	Johor	2	1	1	1	12.08	0	0	36.75	1.12	0.32	0	0
S222	2	40	161	80	1	Selangor	2	1	2	1	0	0	0	34.13	1.27	0	0	0
S226	2	34	167	108	1	KL	2	1	2	1	0	0	0	32.96	1.32	0	0	0
S229	2	34	149	78	1	Selangor	2	1	2	1	0	0	0	38.26	1.1	0.24	0	0
S230	2	38	155	75	1	KL	2	1	2	1	0	0	0	32.87	0	0	0	13.32
S301	2	29	155	58	1	KL	2	1	2	1	11.96	0	0	34.22	1.16	0.24	0	0
S303	1	29	167	62	1	Selangor	2	1	2	1	0	0	0	34.51	1.31	0.37	0	0
S304	2	26	154	52	2	KL	2	1	1	1	11.96	0	0	37.7	0	0	0	0
S309	2	33	163	63	1	KL	2	2	1	1	12.16	0	0	33.88	1.21	0.49	0	0
S310	2	31	150	44	1	KL	2	1	2	1	12.16	0	0	30.83	0.97	0	0	0
S311	2	31	159	93	1	KL	2	1	1	1	11.88	0	0	35.51	0	0	0	0
S312	1	34	179	60	1	Selangor	2	1	2	1	12	0	0	38.05	1.08	0	0	0
S314	1	29	166	75	1	KL	2	2	2	1	11.84	0	0	32.35	0	0	0	0
S315	1	54	160	49	1	Selangor	2	1	2	1	12.2	0	0	33.22	1	0	0	0
S319	1	28	167	75	1	Selangor	2	1	2	1	12.36	0	0	37.83	1.16	0	0	0
S320	1	23	168	70	1	KL	1	2	2	1	12.16	0	0	31.71	0	0	0	0
S324	1	24	168	81	1	Negeri Sembilan	2	1	2	1	0	0	0	32.65	0	0	0	0
S325	2	39	151	48	1	Selangor	2	1	2	1	0	0	0	43.23	1.32	0	0	0
S326	2	25	156	67	1	Selangor	2	1	2	1	0	0	0	31.95	0.99	0	0	0
S327	2	27	162	119	1	Selangor	2	1	1	1	0	0	0	38.7	0	0	0	0
S401	2	23	153	54	1	Melaka	2	2	2	1	0	0	0	29.1	0	0	0	0
S403	1	23	168	56	1	Selangor	2	1	2	1	0	0	0	31.81	1.11	0	0	0
S407	2	20	154	45	1	Selangor	2	1	1	1	0	0	0	30.74	0	0	0	0
S411	1	20	180	75	1	Selangor	2	1	2	2	0	0	0	36.6	0	0	0	0
S412	2	28	157	76	1	KL	2	1	1	1	12.08	0	0	32.23	0	0	0	0
S413	1	25	156	49	1	Selangor	2	2	1	1	0	0	0	33.19	0	0	0	0
S415	1	23	164	53	1	Selangor	2	2	2	1	0	0	0	31.37	0	0	0	0
S416	2	60	146	71	1	KL	2	1	1	1	0	0	0	33.9	1.16	0	0	0
S417	1	23	162	52	1	Selangor	2	2	2	1	0	0	0	27.84	0	0	0	0
S418	2	34	148	57	1	KL	2	1	2	1	12.28	0	0	32.29	1.44	0	0.68	0
S419	2	25	145	63	1	KL	2	1	2	2	0	0	0	32.86	1.02	0	0	5.12
S422	1	30	165	81	1	Selangor	2	2	2	1	0	0	0	35.03	3.12	0	0	0
S423	2	55	150	46	1	Selangor	2	1	1	2	12.04	0	0	36.33	1.1	0.39	0.7	0
S424	1	60	166	76	3	Selangor	2	2	2	2	11.64	0	0	33.19	1.59	0.48	0	0
S503	2	28	158	49	1	KL	2	1	2	1	9.16	0	0	29.54	0	0	0	0
S505	1	24	181	75	1	Selangor	2	2	2	1	0	0	0	31.23	0	0	0	0
S506	1	24	157	58	1	KL	2	1	2	1	0	0	0	30.81	1.8	0	0	0
S514	2	21	162	58	2	Melaka	2	1	1	1	0	0	0	33.22	3.9	0.04	0	9.24
S515	2	21	163	52	1	KL	2	1	1	1	0	0	0	30.91	0	0	0	0
S516	2	24	143	34	1	KL	2	1	1	1	0	0	0	27.63	1.5	0.16	0.16	0
S517	2	41	149	54	1	KL	2	1	1	1	9.36	0	0	36.52	1.2	0.36	0.17	0
S520	2	28	157	45	1	KL	2	1	2	1	0	0	0	34.63	1.1	0.05	0	0
S521	2	26	158	52	1	Johor	2	2	1	1	0	0	0	44.39	0	0	0	0
S522	2	26	146	43	1	KL	2	2	1	1	0	0	0	29.84	0	0	0	0
S601	2	23	152	53	1	Selangor	2	2	1	2	0	0	0	27.45	0	0	0	0
S602	1	20	164	48	2	Selangor	2	2	2	2	0	0	0	28.63	1.1	0	0	0
S606	2	25	145	36	1	KL	2	1	2	1	0	0	0	24.46	1.8	0.06	0	4.24
S609	2	31	152	52	1	KL	2	1	1	2	0	0	0	30.23	0	0	0	0
S610	1	33	160	65	1	KL	1	1	2	2	0	0	0	35.35	1.2	0.27	0	0
S614	2	28	151	56	1	KL	2	1	2	1	0	0	0	30.36	0	0	0	0
S617	2	24	169	99	2	Selangor	2	2	1	1	0	0	0	36.3	1.6	0.34	0.3	6.04
S624	1	32	164	70	1	Selangor	2	1	2	2	0	0	0	36.52	0	0	0	0
S627	2	30	153	71	1	Selangor	2	1	2	1	0	0	0	29.54	0	0	0	0
S628	2	54	142	62	1	KL	2	2	2	1	0	0	0	30.14	0	0	0	5.76
S629	2	29	154	62	1	KL	2	1	1	1	0	0	0	33.82	0	0.08	0	0
S630	2	38	157	103	1	KL	2	1	1	1	0	0	0	27.98	0	0	0	4.36
S705	2	28	154	67	1	Negeri Sembilan	2	1	1	1	0	0	0	35.76	0	0	0	0
S706	2	26	156	59	1	Negeri Sembilan	2	1	1	1	0	0	0	33.78	1.4	0.28	0.12	0
S715	2	30	152	65	1	Selangor	2	1	2	1	9.24	0	0	33.27	0	0	0	0
S716	2	28	150	61	1	KL	2	2	1	1	0	0	0	30.83	0	0	0	0
S717	2	22	155	58	1	KL	2	1	1	1	0	0	0	35.76	0	0	0	0
S721	2	46	153	80	1	KL	2	1	2	1	0	0	0	33.21	1.4	0.39	0.6	4.88
S723	2	29	150	51	1	Selangor	2	1	1	1	0	0	0	50.64	0	0	0	0
S725	2	22	151	46	1	Selangor	2	2	2	1	0	0	0	39.72	0	0.04	0	0
S802	2	34	156	71	1	Selangor	2	1	1	1	0	0	0	30.47	1.4	0	0	4.36
S804	2	25	163	105	1	Selangor	2	1	1	1	0	0	0	29.09	1.2	0.06	0	0
S807	2	46	156	92	3	Selangor	2	2	2	2	0	0	0	30.87	2	0	0	4.36
S808	2	36	152	51	1	Selangor	2	1	2	1	0	0	0	35.12	0	0.06	0	0
S812	2	23	152	42	2	Selangor	2	1	2	1	0	0	0	29.93	4.4	2.79	0	13.68
S813	2	36	155	57	1	KL	2	1	1	1	0	0	0	29.13	0	0.25	0	0
S814	2	31	156	85	1	KL	2	1	1	1	9.52	0	0	29.39	0	0.06	0	0
S816	2	30	150	57	1	KL	2	2	2	1	0	0	0	33.08	0	0	0	0
S817	2	29	164	64	1	KL	2	2	1	1	0	0	0	45.21	0	0	0	0
S818	2	21	154	63	1	Selangor	2	1	1	1	0	0	0	36.89	0	0	0	0
S819	2	21	145	42	1	Selangor	2	1	2	1	0	0	0	29.47	0	0	0	0
S820	2	21	149	47	1	Kelantan	2	1	1	1	0	0	0	29.61	1.5	0	0	0
S822	2	34	150	60	1	Selangor	2	1	1	1	0	0	0	31.84	1.2	0.23	0	0
S823	2	30	154	62	1	Selangor	2	1	2	1	0	0	0	39.38	0	0	0	0
S825	1	20	171	71	1	Selangor	2	2	2	1	0	0	0	44.29	0	0	0	0
S828	2	29	153	50	1	Selangor	2	1	1	1	0	0	0	34.78	0	0.11	0	0
S829	2	32	160	50	2	Selangor	2	1	1	1	0	0	0	42.36	0	0	0	0
S831	2	28	169	89	1	Selangor	2	2	1	1	0	0	0	0	0	0	0	0
S906	1	24	154	47	1	KL	2	1	2	1	0	0	0	32	0	0	0	0
S908	1	26	181	81	3	Selangor	2	1	2	1	0	0	0	32.29	0	0	0	0
S909	2	23	149	34	1	Selangor	2	2	1	1	0	0	0	30.27	0	0.16	0	0
S910	1	23	163	42	1	Selangor	2	2	2	1	0	0	0	33.46	0	0	0	0
S911	1	20	171	56	2	KL	2	1	2	1	0	0	0	31.8	0	0	0	0
S914	2	22	152	42	1	KL	2	1	2	1	0	0	0	36.45	0	0.01	0	0
S915	2	22	158	65	1	Trengganu	2	2	1	1	0	0	0	38.75	0	0	0	0
S916	2	21	153	57	1	KL	2	1	1	1	0	0	0	38.32	0	0	0	0
S917	2	21	168	63	1	Johor	2	2	1	1	0	0	0	35.92	0	0	0	0
S919	1	51	160	64	1	Selangor	2	1	2	1	0	30.88	0	34.09	0	0	0	0
S921	2	20	152	48	1	Selangor	2	1	1	1	0	0	0	34.06	0	0	0	0
S922	1	24	175	58	1	Selangor	2	1	2	2	0	0	0	30.59	0	0.09	0	0
S925	1	24	166	61	1	Johor Baru	2	1	2	1	0	0	0	33.43	0	0	0	0
S120	2	47	164	52	1	KL	2	1	2	1	0	0	0	52.4	0	0	0	0
S122	2	38	150	53	1	Selangor	2	1	1	1	0	0	0	66.8	0	0	0	0
S133	2	33	147	63	1	Selangor	2	1	2	1	0	7.56	0	53.2	0	0	0	4.6
S146	1	32	166	51	1	Selangor	2	2	2	1	0	18.04	0	24.4	1.33	0	0	0
S148	2	33	163	92	2	Selangor	2	1	1	2	0	11.88	0	28.4	2.68	0.44	0	16.76
S151	2	59	152	68	1	Selangor	2	1	2	2	11.72	11.12	0	30.9	6.04	0.32	0.42	14.88
S308	2	34	151	50	1	Selangor	2	1	2	1	12.16	0	0	34.03	1.04	0.37	0	0
S421	2	45	156	61	1	Selangor	2	1	2	1	12.24	0	0	29.77	0	0	0	0
S511	2	22	170	70	2	Penang	2	1	1	1	0	0	0	28.07	3.7	2.78	0.07	12.88
S810	2	23	155	54	2	Selangor	2	1	1	1	0	0	0	30.57	1.6	0.37	0.53	5.12
S830	2	28	154	54	1	KL	2	1	1	1	0	0	0	38.8	1.3	0.1	0.09	0
